# Supplementary material for: Hollow spheres of crystalline porous metal oxides: A generalized synthesis route via nanocasting with mesoporous carbon hollow shells
Source: Royal Society of Chemistry journal article supplement (doi:10.1039/b502558c), 2005-01-01
Supplement: b502558c.pdf [file b502558c.pdf]

This journal is © The Royal Society of Chemistry 2005  
Electronic supplementary information for Journal of Materials Chemistry

# **Hollow spheres of crystalline porous metal oxides nanocast by mesoporous carbon**

Yongde Xia, and Robert Mokaya

*School of Chemistry, University of Nottingham, University Park,*

*Nottingham NG7 2RD, U. K.*

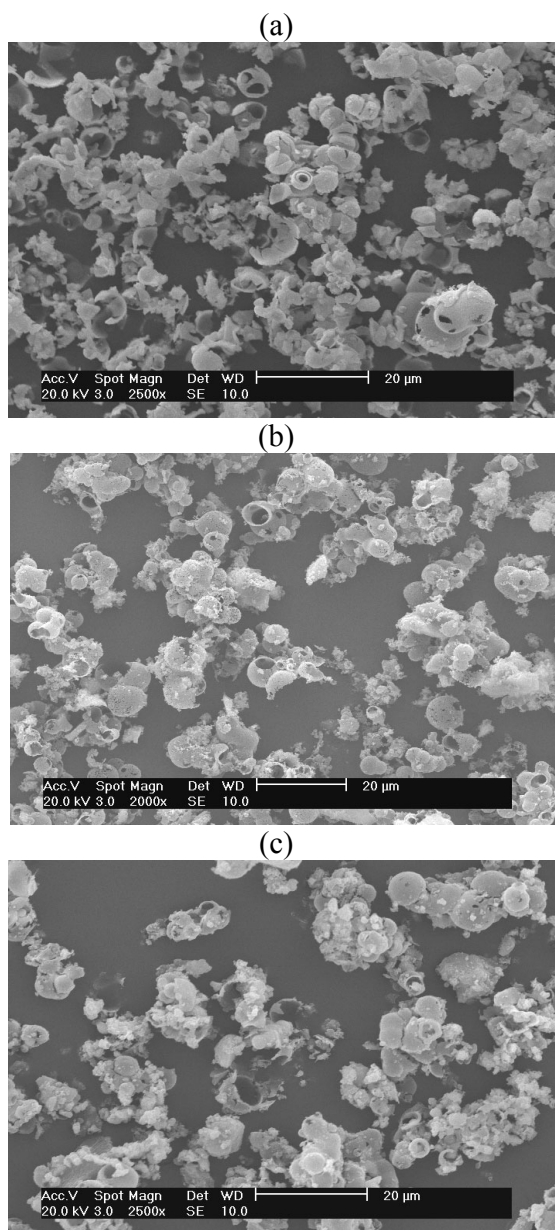

**Supporting Figure 1.** SEM images of (a)  $\text{ZrO}_2$  and (b)  $\text{MgO}$  metal oxides, and (c)  $\text{MgTiO}_3$  binary oxide nanocast from mesoporous carbon hollow spheres

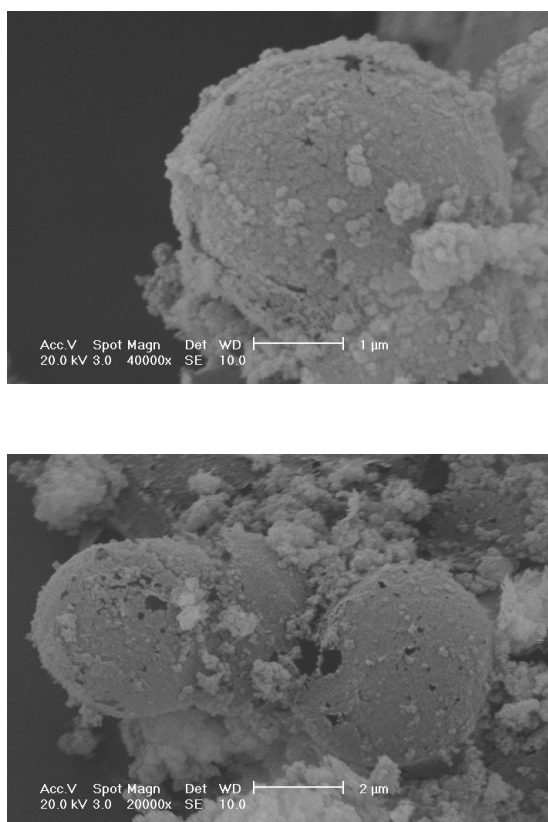

**Supporting Figure 2.** SEM images of mixed oxide, MgO-Al<sub>2</sub>O<sub>3</sub>, nanocast from mesoporous carbon hollow spheres.
